# Supplementary material for: A Non-Invasive Neonatal Signature Predicts Later Development of Atopic Diseases
Source: MDPI journal article supplement (doi:10.3390/jcm11102749), 2022-05-12
Supplement: s1 [file s1]

## SUPPLEMENTARY TABLES

**Supplementary Table S1.** Comparison of biomarkers and CT of Archaea according to the presence or absence of maternal antibiotic therapy and according to the mode of delivery.

| Parameters   | Peripartum maternal antibiotic therapy | p-value | Mode of delivery | p-value |
|--------------|----------------------------------------|---------|------------------|---------|
| CT Archaea   | Yes                                    | 0.69    | Cesarean section | 0.90    |
|              | No                                     |         | Vaginal delivery |         |
| IgE          | Yes                                    | 1       | Cesarean section | 0.98    |
|              | No                                     |         | Vaginal delivery |         |
| Tryptase     | Yes                                    | 0.43    | Cesarean section | 0.48    |
|              | No                                     |         | Vaginal delivery |         |
| Calprotectin | Yes                                    | 0.70    | Cesarean section | 0.07    |
|              | No                                     |         | Vaginal delivery |         |
| EDN          | Yes                                    | 0.83    | Cesarean section | 0.11    |
|              | No                                     |         | Vaginal delivery |         |
| TGF- $\beta$ | Yes                                    | 0.10    | Cesarean section | 0.40    |
|              | No                                     |         | Vaginal delivery |         |
| IL-1 $\beta$ | Yes                                    | 0.06    | Cesarean section | 0.61    |
|              | No                                     |         | Vaginal delivery |         |
| IL-10        | Yes                                    | 0.004   | Cesarean section | 0.16    |
|              | No                                     |         | Vaginal delivery |         |
| IL-6         | Yes                                    | 0.71    | Cesarean section | 0.71    |

**Supplementary Table S2.** Comparison of median CT of Archaea in preterm infants according to the presence or absence of allergic events during the first year of life.

| Periods    | CT Archaea      |      | p-value |
|------------|-----------------|------|---------|
|            | Allergic events |      |         |
|            | Yes             | No   |         |
| Meconium   | 37.7            | 36.3 | 0.98    |
| Two-weeks  | 36.2            | 37.2 | 0.28    |
| Four-weeks | 37.9            | 37.8 | 0.88    |
| Six-week   | 38.3            | 38.2 | 0.69    |

**Supplementary Table S3.** Comparison of median CTs of Archaea in preterm infants according to the presence or absence of atopic dermatitis during the first year of life.

| Periods  | CT Archaea        |      | p-value |
|----------|-------------------|------|---------|
|          | Atopic dermatitis |      |         |
|          | Yes               | No   |         |
| Meconium | 36.3              | 36.7 | 0.66    |

|                   |      |      |      |
|-------------------|------|------|------|
| <b>Two-weeks</b>  | 37.2 | 37.1 | 0.89 |
| <b>Four-weeks</b> | 37.9 | 37.7 | 0.96 |
| <b>Six-week</b>   | 38.2 | 38.3 | 0.83 |
